# Supplementary material
Source: PubMed Central journal article supplement (PMC3021135)
Supplement: NIHMS260043-supplement-ESI.pdf [file NIHMS260043-supplement-ESI.pdf]

## Electronic Supplementary Information

# Synthesis and Characterization of Oligonucleotides Containing an O<sup>6</sup>-2'-Deoxyguanosine-Alkyl-O<sup>6</sup>-2'-Deoxyguanosine Interstrand Cross-Link in a 5'-GNC Motif and Repair by Human O<sup>6</sup>-Alkylguanine-DNA Alkyltransferase

Francis P. McManus, Qingming Fang, Jason D. M. Booth, Anne M. Noronha, Anthony E. Pegg and Christopher J. Wilds\*

| Contents                                                                                                                                 | Page |
|------------------------------------------------------------------------------------------------------------------------------------------|------|
| <b>Supplementary Figure 1</b> - 300 MHz <sup>1</sup> H NMR spectrum of compound ( <b>6a</b> ) (in d <sub>6</sub> -DMSO)                  | S-2  |
| <b>Supplementary Figure 2</b> - 300 MHz <sup>1</sup> H NMR spectrum of compound ( <b>6b</b> ) (in CDCl <sub>3</sub> )                    | S-3  |
| <b>Supplementary Figure 3</b> - 121.5 MHz <sup>31</sup> P NMR spectrum of compound ( <b>7a</b> ) (in d <sub>6</sub> -acetone)            | S-4  |
| <b>Supplementary Figure 4</b> - 121.5 MHz <sup>31</sup> P NMR spectrum of compound ( <b>7b</b> ) (in d <sub>6</sub> -acetone)            | S-5  |
| <b>Supplementary Figure 5</b> - C-18 RP HPLC profiles to monitor TBS removal                                                             | S-6  |
| <b>Supplementary Figure 6</b> - Strong anion exchange HPLC profiles of crude and purified <b>XL7</b>                                     | S-7  |
| <b>Supplementary Figure 7</b> - C-18 RP HPLC profile of digested cross-linked duplexes <b>XL4</b> and <b>XL7</b>                         | S-8  |
| <b>Supplementary Figure 8</b> - ESI MS spectrum of oligonucleotide <b>XL4</b>                                                            | S-9  |
| <b>Supplementary Figure 9</b> - ESI MS spectrum of oligonucleotide <b>XL7</b>                                                            | S-10 |
| <b>Supplementary Figure 10</b> - Absorbance (A <sub>260</sub> ) versus temperature profiles                                              | S-11 |
| <b>Supplementary Figure 11</b> - CD spectra of non cross-linked control duplex and cross-linked duplexes <b>XL4</b> and <b>XL7</b>       | S-12 |
| <b>Supplementary Figure 12</b> - Molecular models of non cross-linked control duplex and cross-linked duplexes <b>XL4</b> and <b>XL7</b> | S-13 |
| <b>Supplementary Figure 13</b> - 12% SDS-PAGE Gel of purified hAGT proteins                                                              | S-14 |
| <b>Supplementary Figure 14</b> - Effects of mutations on secondary structure of hAGT by CD                                               | S-15 |
| <b>Supplementary Figure 15</b> - Effects of mutations tertiary structure of hAGT by monitoring intrinsic fluorescence                    | S-16 |
| <b>Supplementary Figure 16</b> - Effect of mutations on hAGT stability monitored by thermal denaturation as measured by CD               | S-17 |
| <b>Supplementary Figure 17</b> - Graphic representation of the % ICL                                                                     | S-18 |
| <b>Supplementary Figure 18</b> - Time course repair of <b>XL4</b> and <b>XL7</b> by hAGT                                                 | S-19 |
| <b>Supplementary Figure 19</b> - Graphic representation of the % abundance of each species in the time course repair by hAGT             | S-20 |
| <b>Supplementary Figure 20</b> - Electromobility shift assay of C145S hAGT binding to the control DNA duplex                             | S-21 |
| <b>Supplementary Figure 21</b> - Hill plot representation of log[PD]/[D] versus log[P] for the control duplex                            | S-22 |
| <b>Supplementary Table 1</b> - ESI-MS results of wild-type hAGT and variants                                                             | S-23 |
| <b>Supplementary Table 2</b> - Effects of mutations on fluorescence emission signals of hAGT                                             | S-24 |
| <b>Supplementary Table 3</b> - Difference in <i>T<sub>m</sub></i> between mutants and wild-type hAGT                                     | S-25 |

**Supplementary Figure 1** - 300 MHz  $^1\text{H}$  NMR spectrum of compound (**6a**) (in  $\text{d}_6\text{-DMSO}$ )

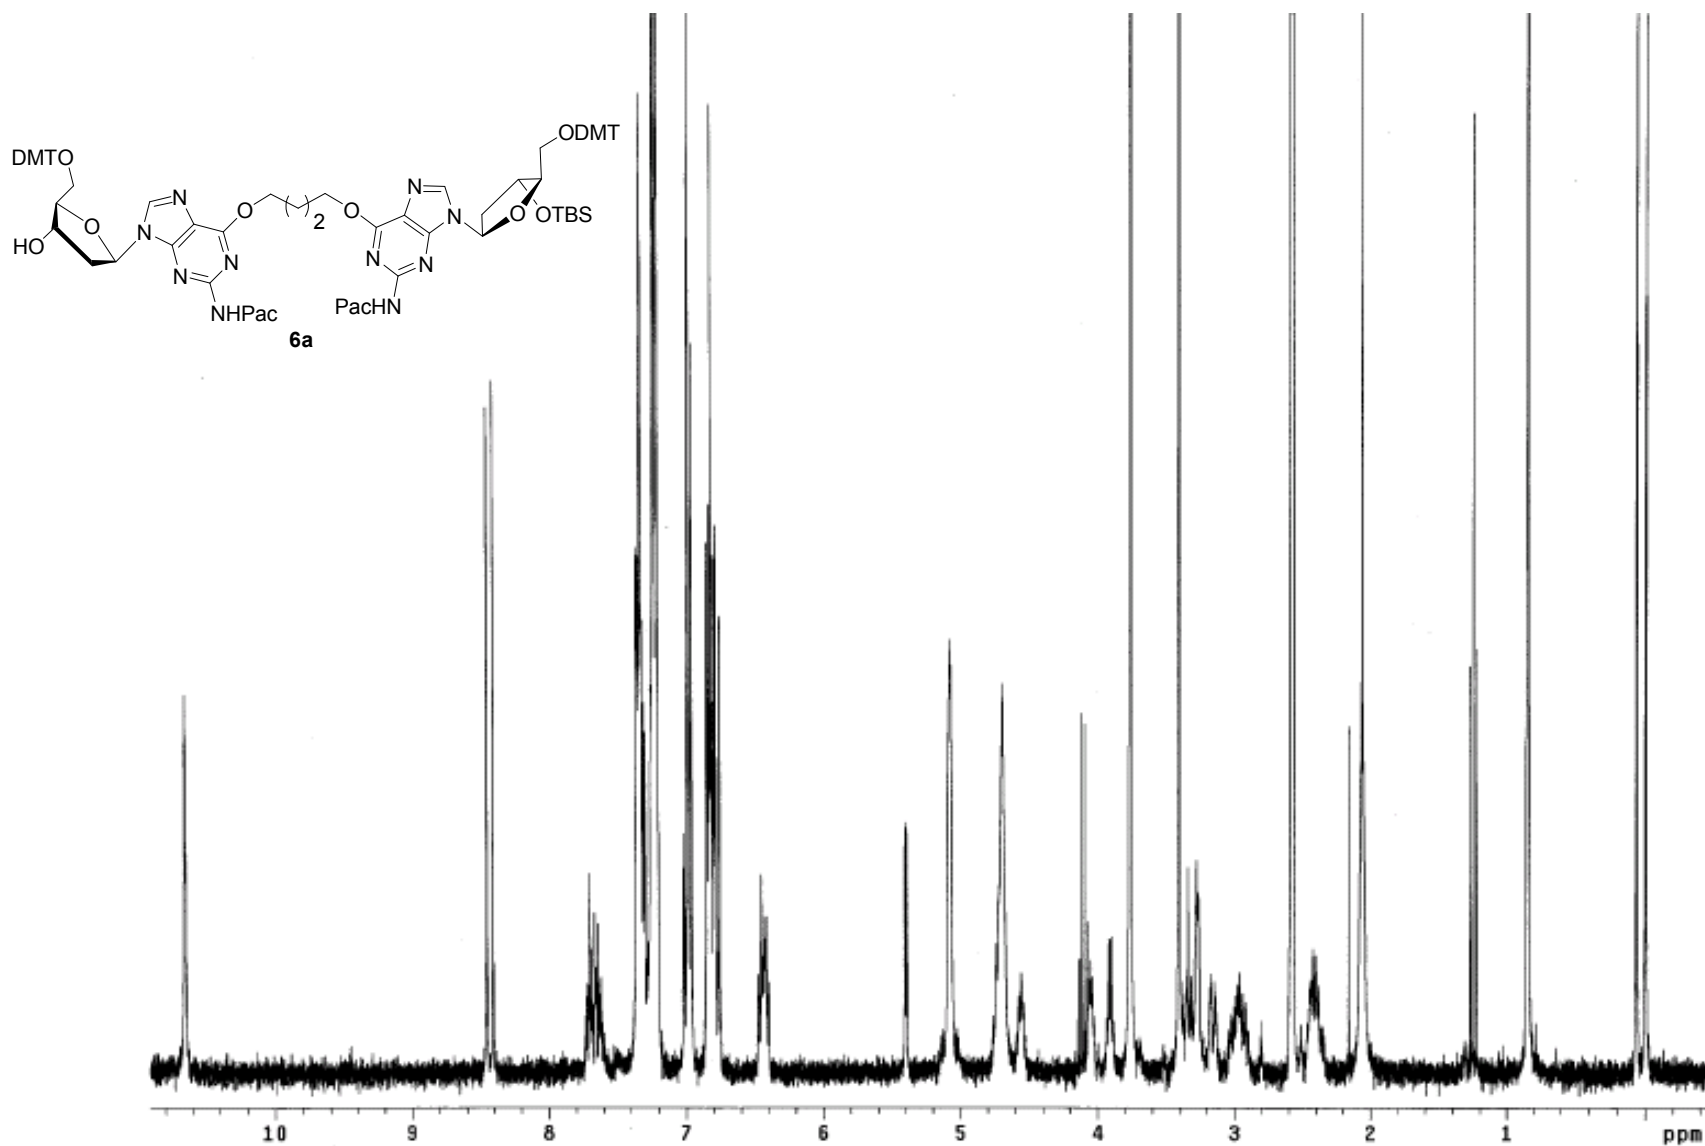

**Supplementary Figure 2** - 300 MHz  $^1\text{H}$  NMR spectrum of compound (**6b**) (in  $\text{CDCl}_3$ )

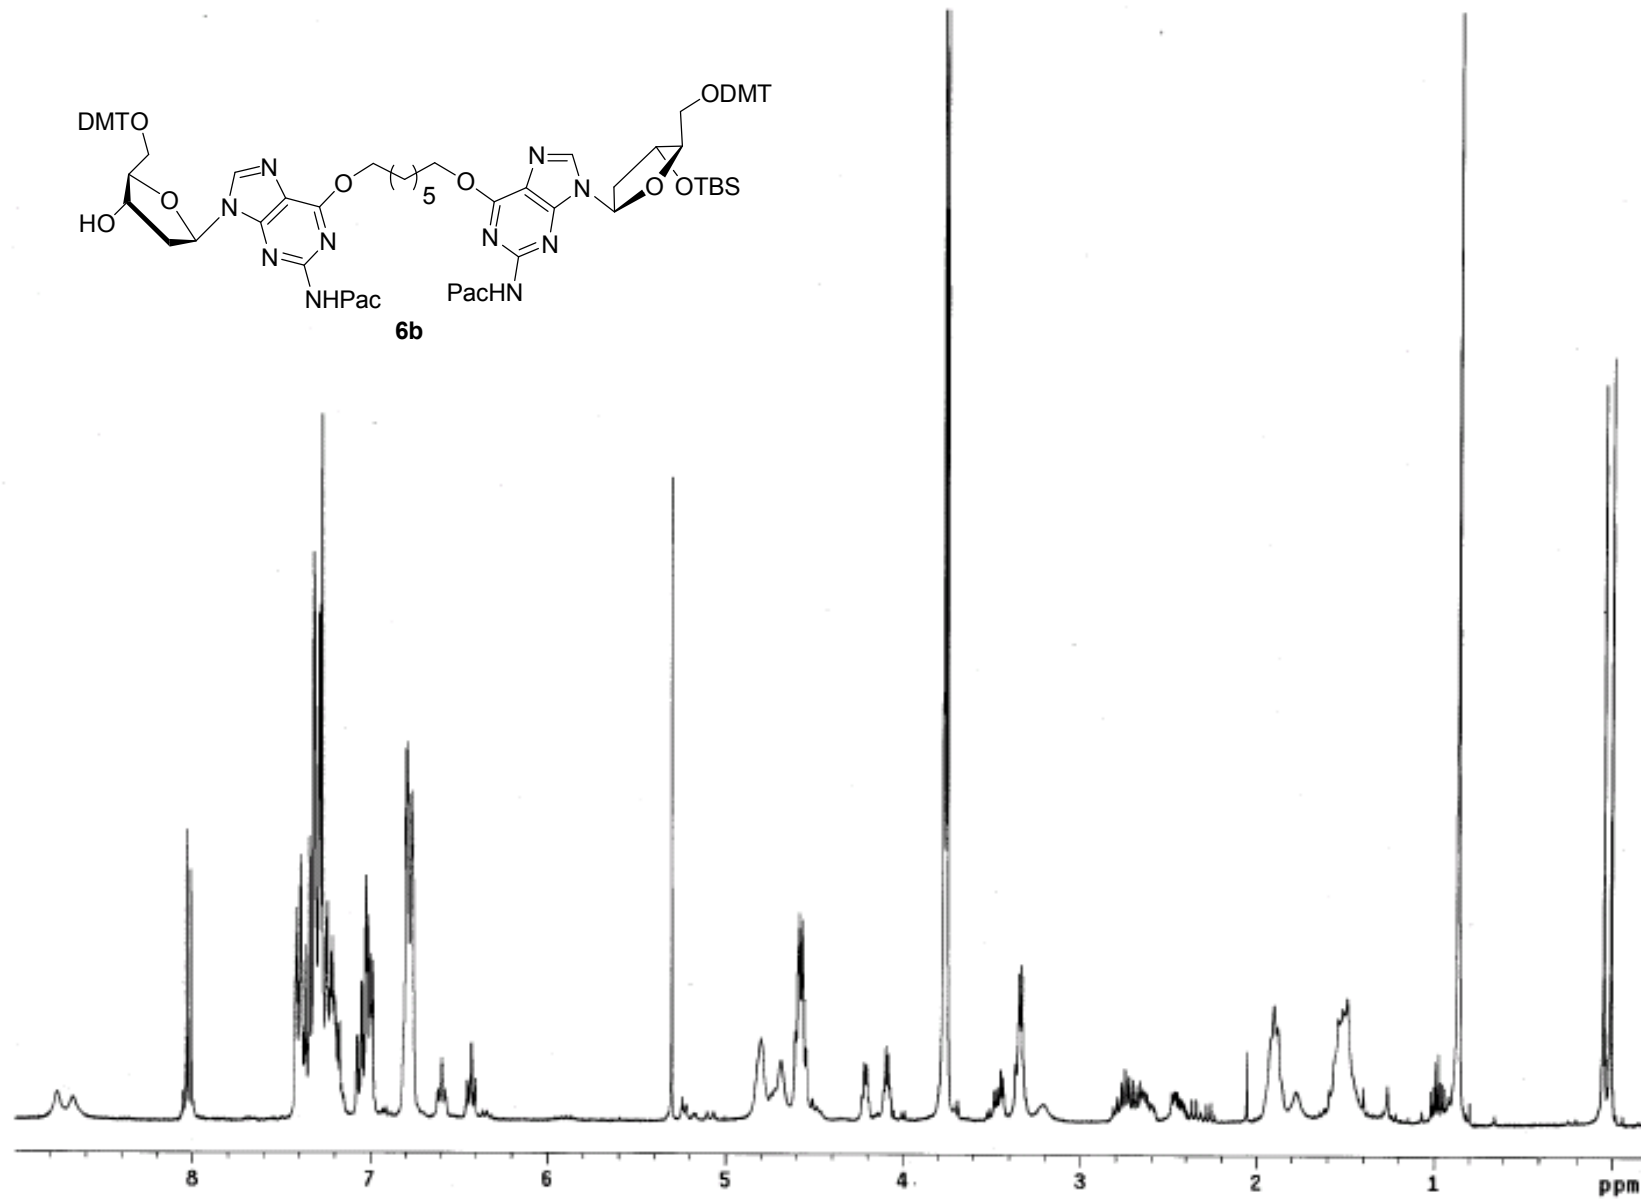

**Supplementary Figure 3** - 121.5 MHz  $^{31}\text{P}$  NMR spectrum of compound (**7a**) (in  $\text{d}_6$ -acetone)

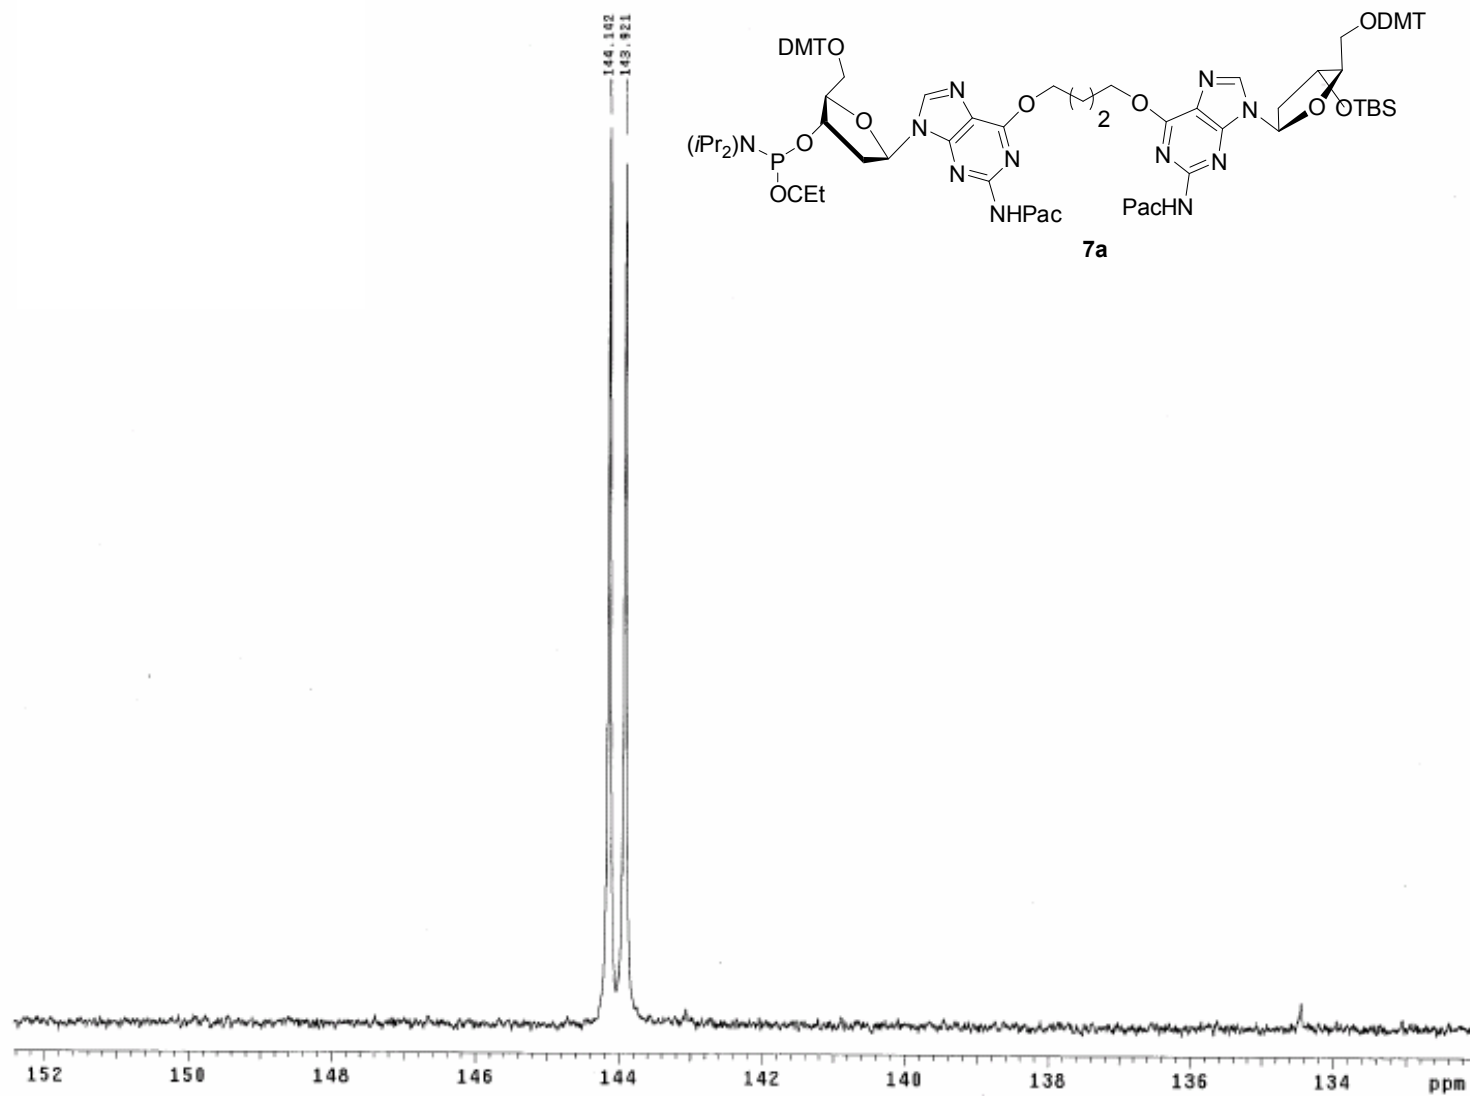

**Supplementary Figure 4** - 121.5 MHz  $^{31}\text{P}$  NMR spectrum of compound (**7b**) (in  $\text{d}_6$ -acetone)

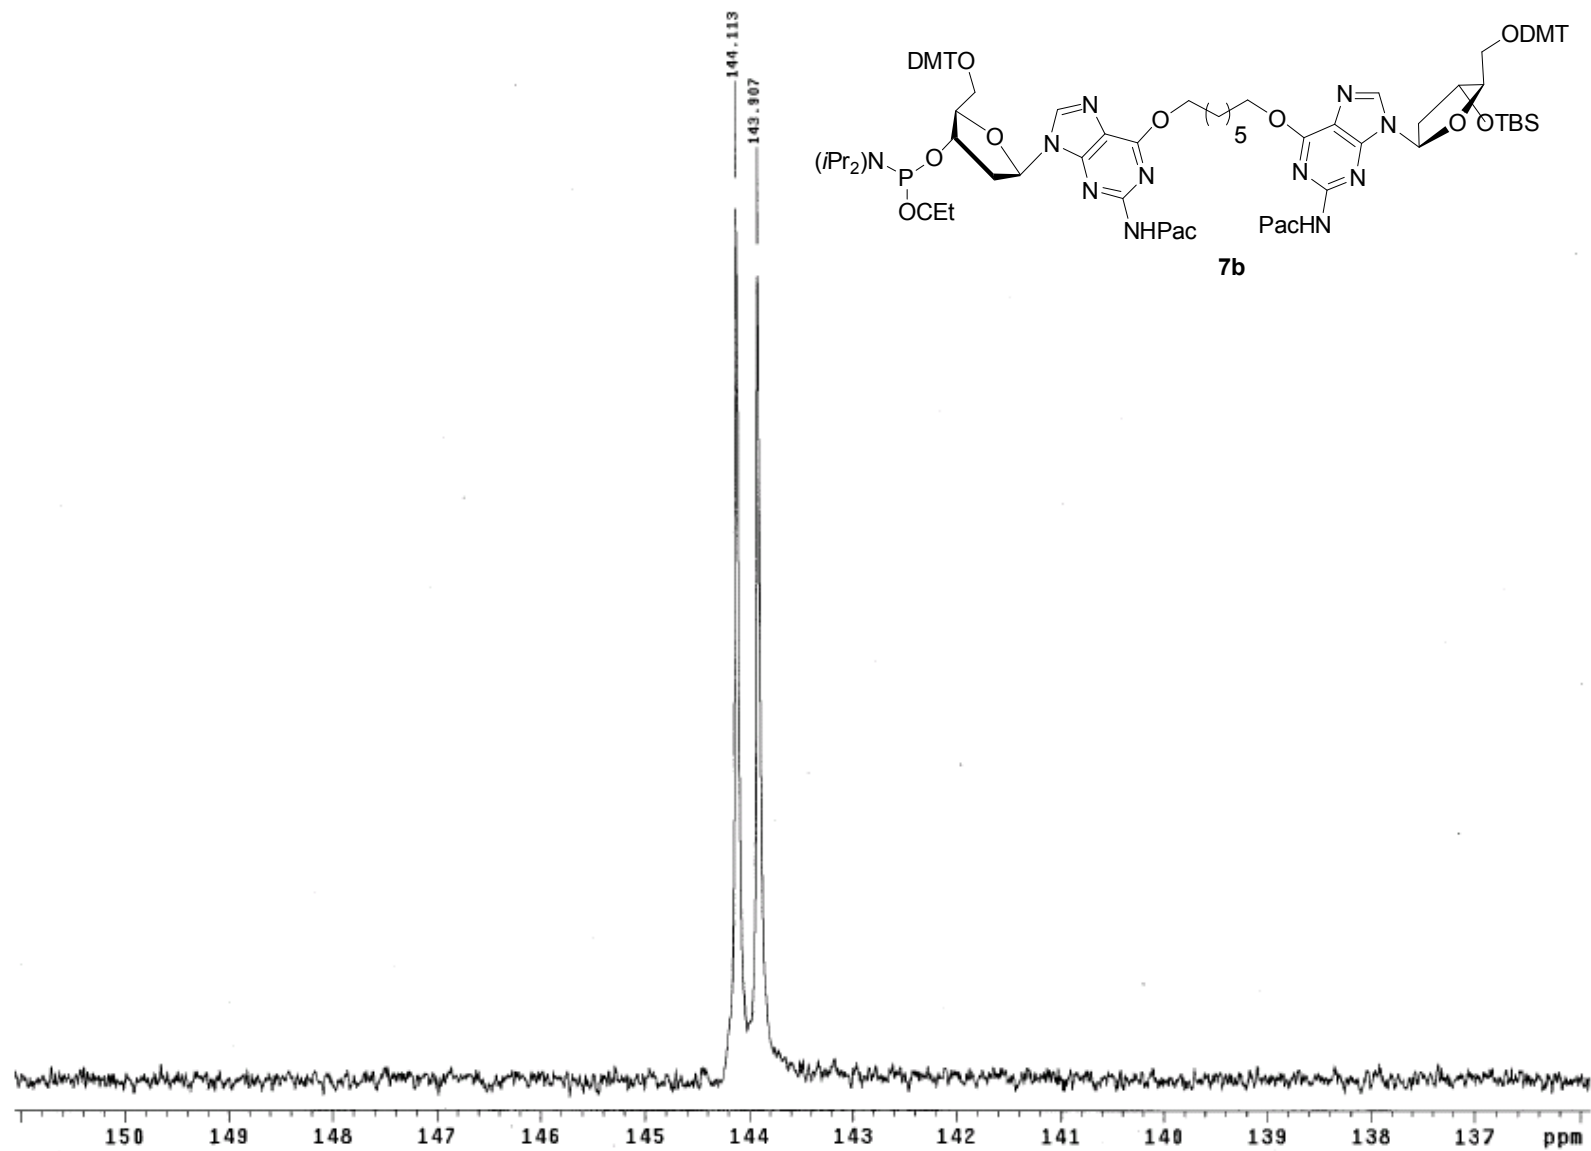

**Supplementary Figure 5** - C-18 HPLC profiles of (A) crude **Y-TBS** (**XL4** precursor), (B) **Y-OH** after removal of the TBS group, and (C) final extension product **XL4**. Gradient of 0-60% buffer B over 30 min (buffer A: 50 mM sodium phosphate, pH 5.8 and buffer B: 50 mM sodium phosphate, pH 5.8, 50% acetonitrile) at a flow rate of 1.0 mL/min and monitored at 260 nm.

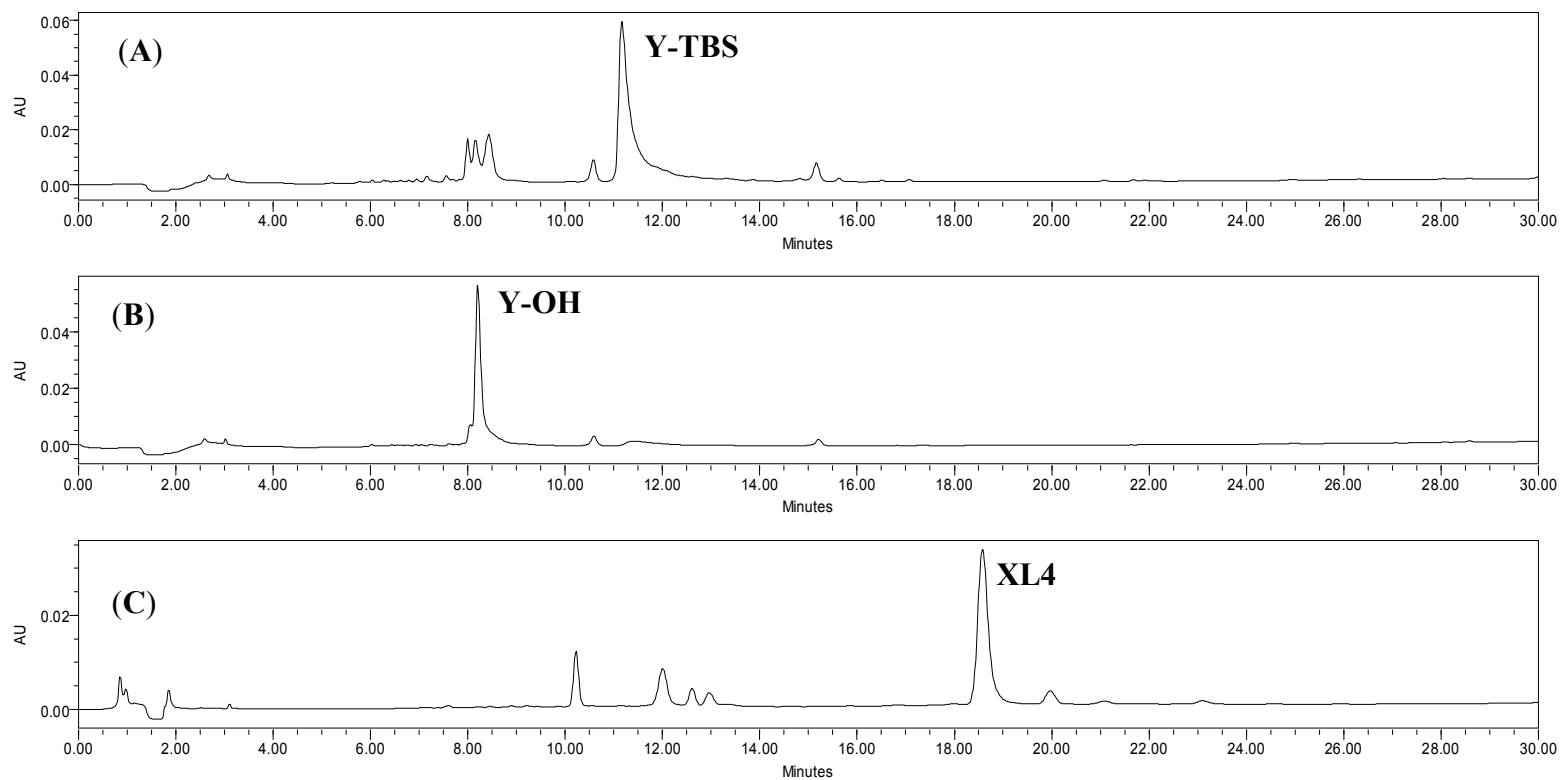

**Supplementary Figure 6** - SAX HPLC profiles of crude **XL7** (A) and purified **XL7** (B). For analytical runs the column was eluted with a linear gradient of 0-60% buffer B over 30 min (buffer A: 100 mM Tris HCl, pH 7.5, 10% acetonitrile and buffer B: 100 mM Tris HCl, pH 7.5, 10% acetonitrile, 1 M NaCl) at a flow rate of 1.0 mL/min over 30 min, monitored at 260 nm.

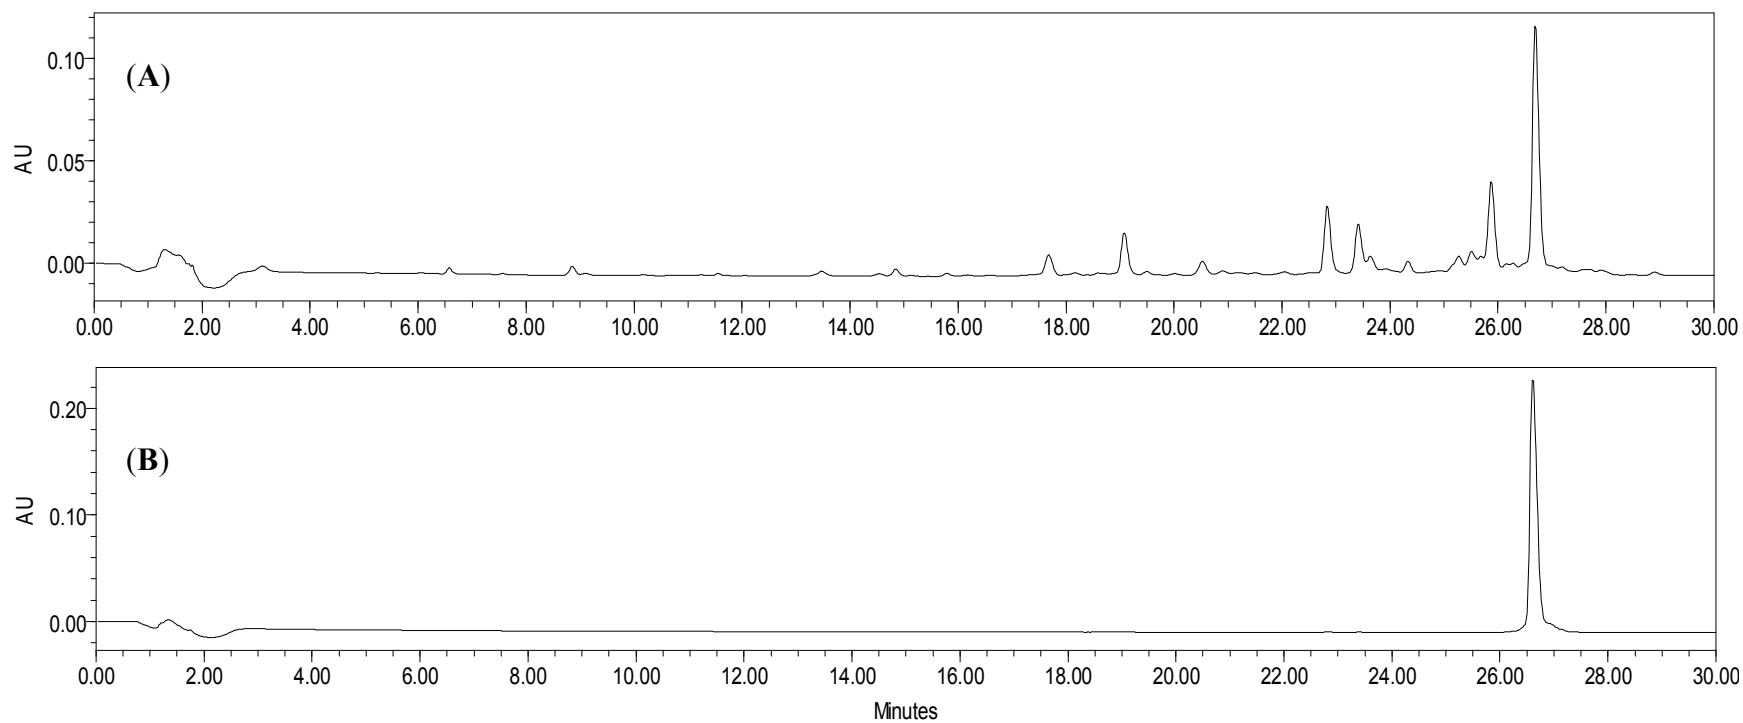

**Supplementary Figure 7** - C-18 HPLC profile of digested cross-linked duplex **XL4** (A) and **XL7** (B). The column was eluted with a linear gradient of 0-60% buffer B over 30 min (buffer A: 50 mM sodium phosphate, pH 5.8 and buffer B: 50 mM sodium phosphate, pH 5.8, 50% acetonitrile) at a flow rate of 1.0 mL/min over 30 min, monitored at 260 nm.

(A)

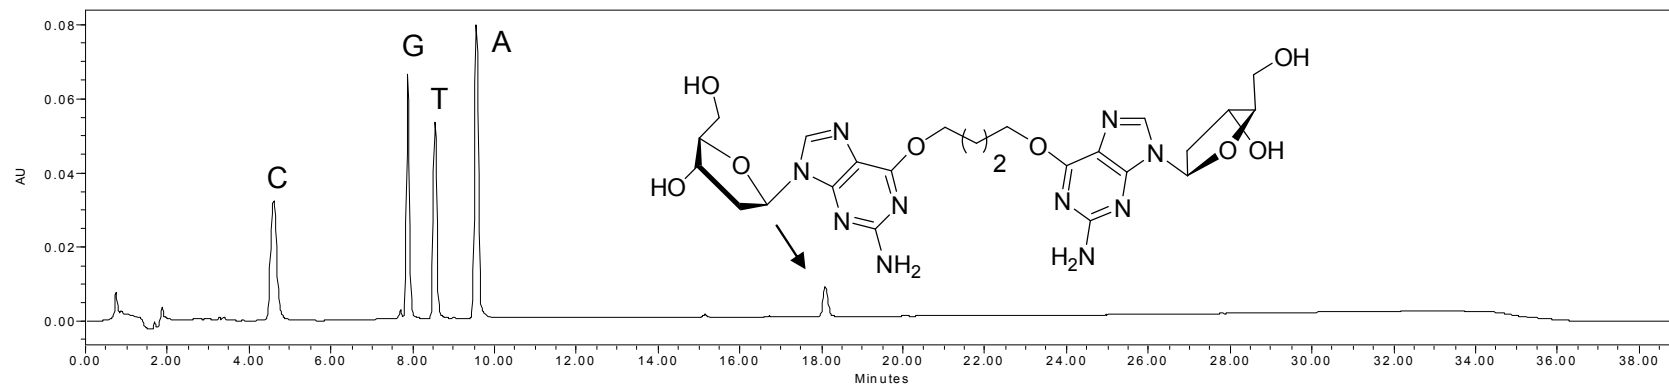

(B)

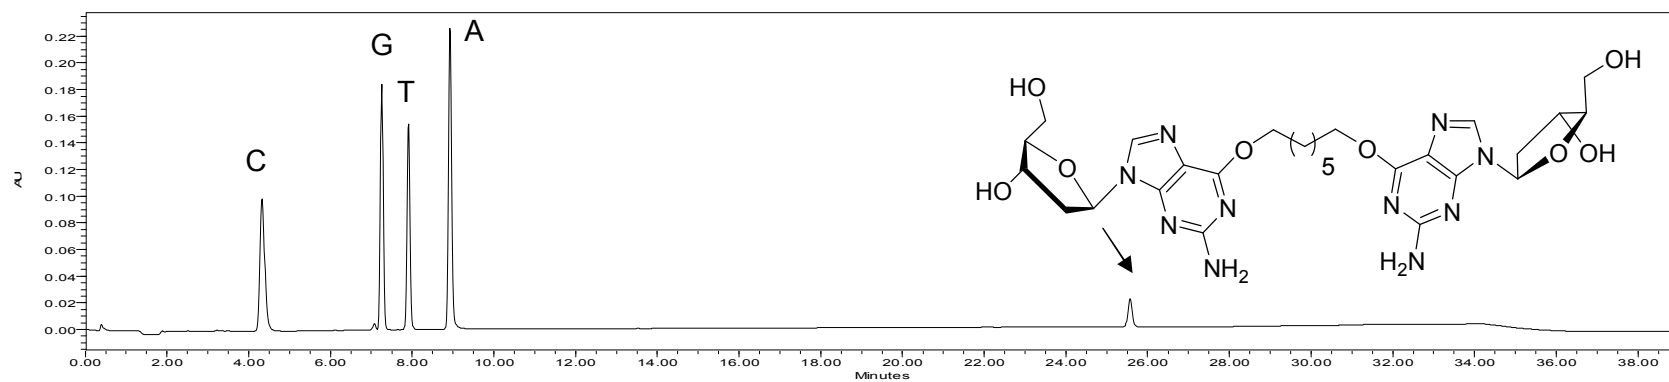



**Supplementary Figure 8** - ESI MS spectrum of oligonucleotide **XL4**

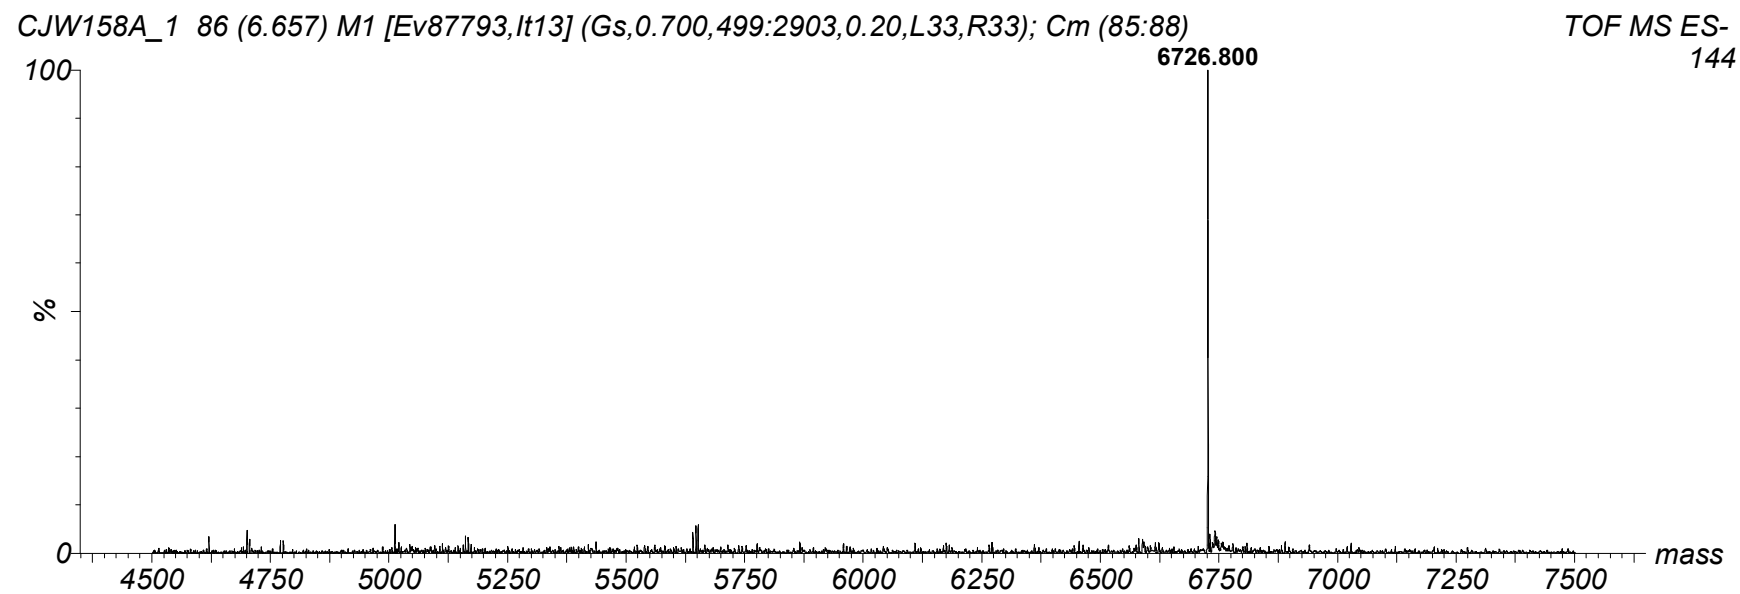

**Supplementary Figure 9** - ESI MS spectrum of oligonucleotide **XL7**

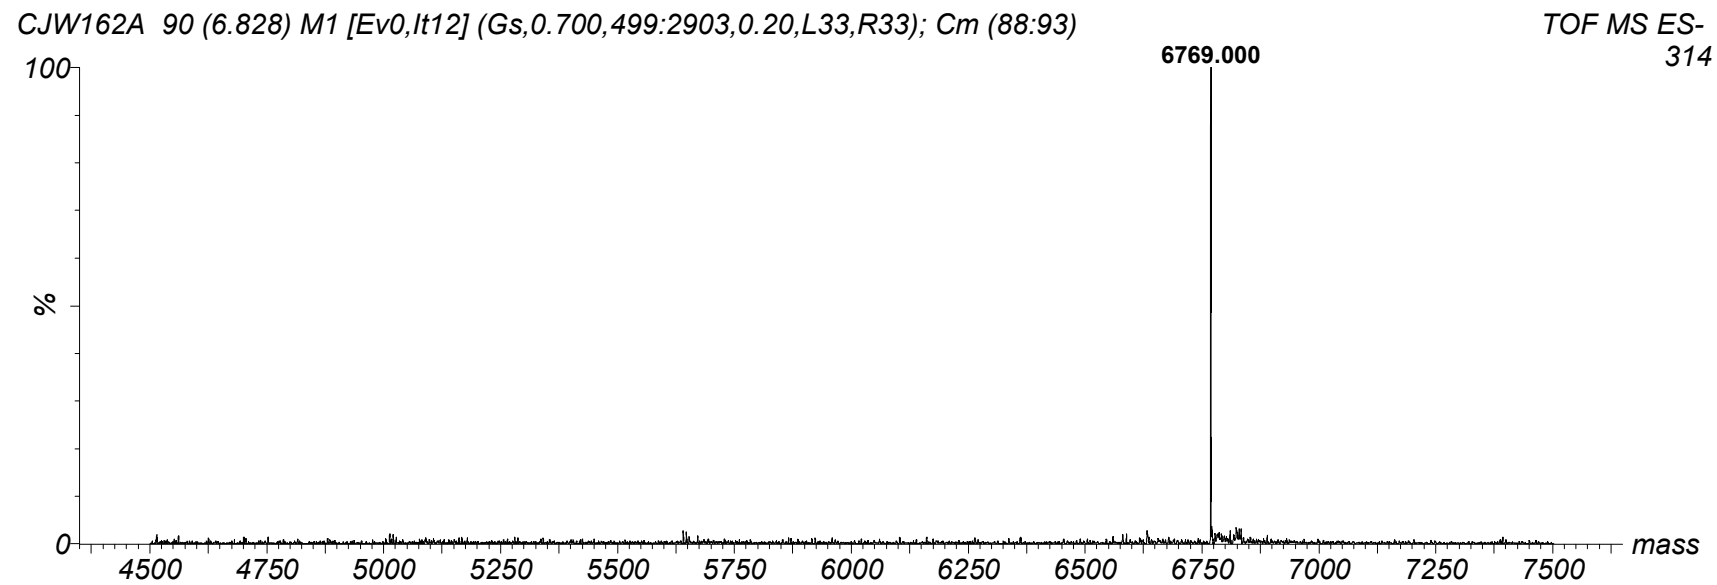

**Supplementary Figure 10** - Absorbance ( $A_{260}$ ) versus temperature profiles of non cross-linked duplex (\_\_\_\_) 5'-dCGATGTCATCG-3'/5'-dCGATGACATCG-3', cross-linked duplex **XL4** (\_\_\_\_), and cross-linked duplex **XL7** (.....). Solutions containing a total strand concentration of 2.8  $\mu\text{M}$  for the cross-linked (**XL4** and **XL7**) and non-cross-linked control duplexes in 90 mM sodium chloride, pH = 7.0, 10 mM sodium phosphate, and 1 mM EDTA buffer, were heated at 0.5°C/min.

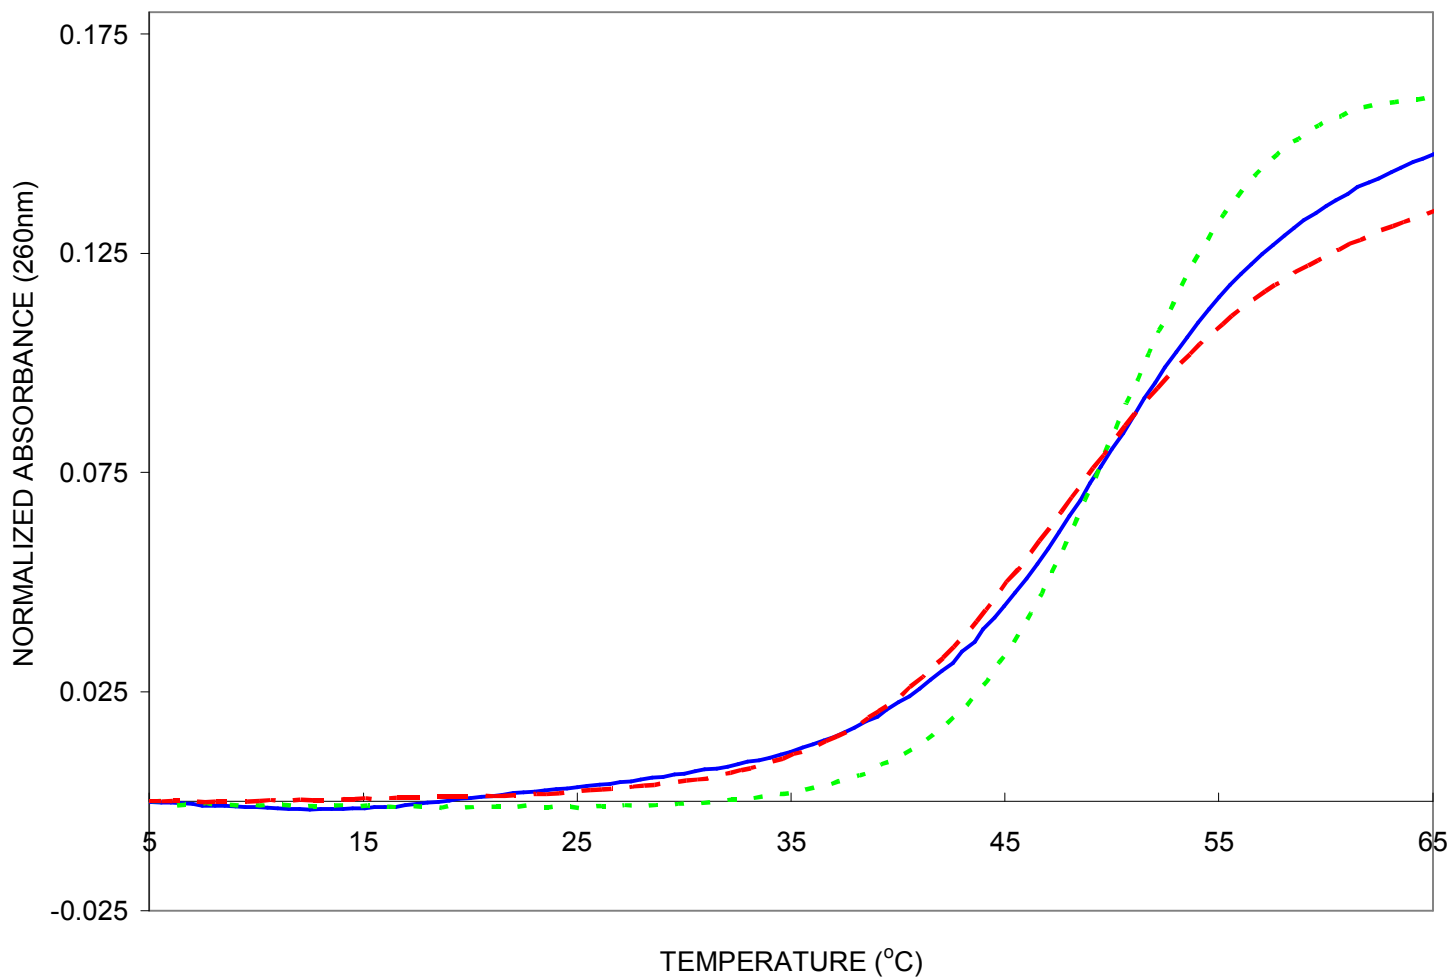

**Supplementary Figure 11** - Circular dichroism spectra of non cross-linked duplex (\_\_\_\_) 5'- dCGATGTCATCG-3'/5'-dCGATGACATCG3', cross-linked duplex **XL 4** (\_\_\_\_), and cross-linked duplex **XL 7** (.....). Solutions containing a total strand concentration of 2.8  $\mu\text{M}$  for the cross-linked duplex **XL 4,7** and 2.8  $\mu\text{M}$  of the non-crosslinked control duplexes in 10 mM sodium phosphate, pH 7.0, 90 mM sodium chloride, and 1 mM EDTA. Spectra are the average of 5 scans and were recorded at 10  $^{\circ}\text{C}$ .

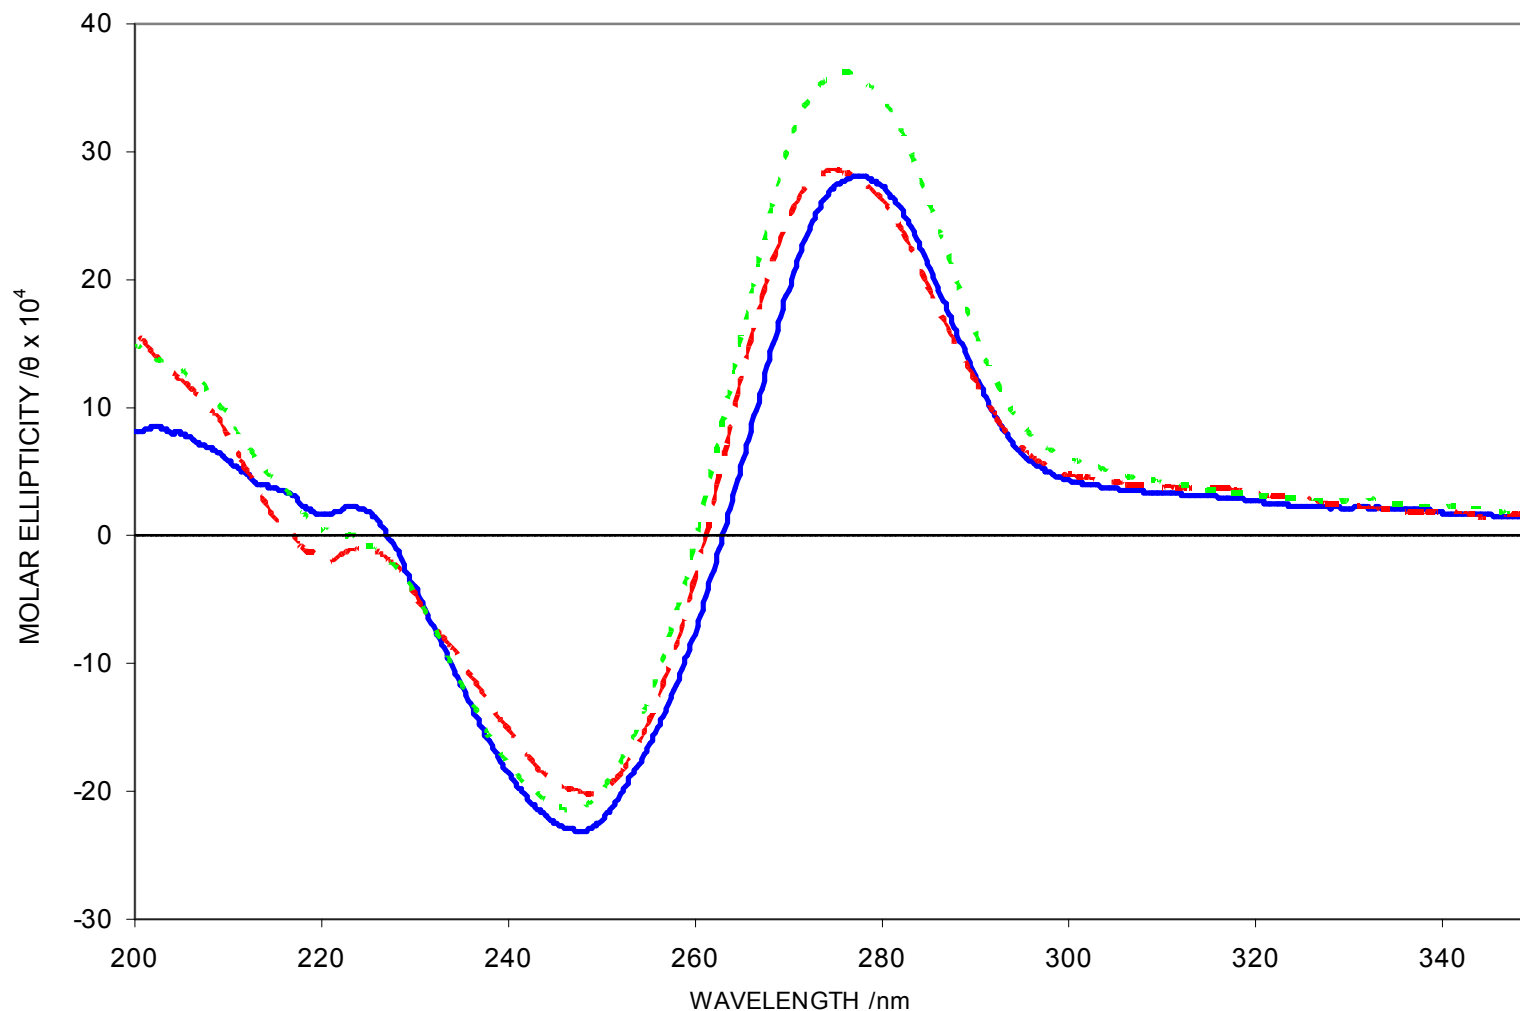

**Supplementary Figure 12** – Molecular models of non cross-linked control duplex and cross-linked duplexes **XL4** and **XL7** that were geometry optimized using the AMBER forcefield.

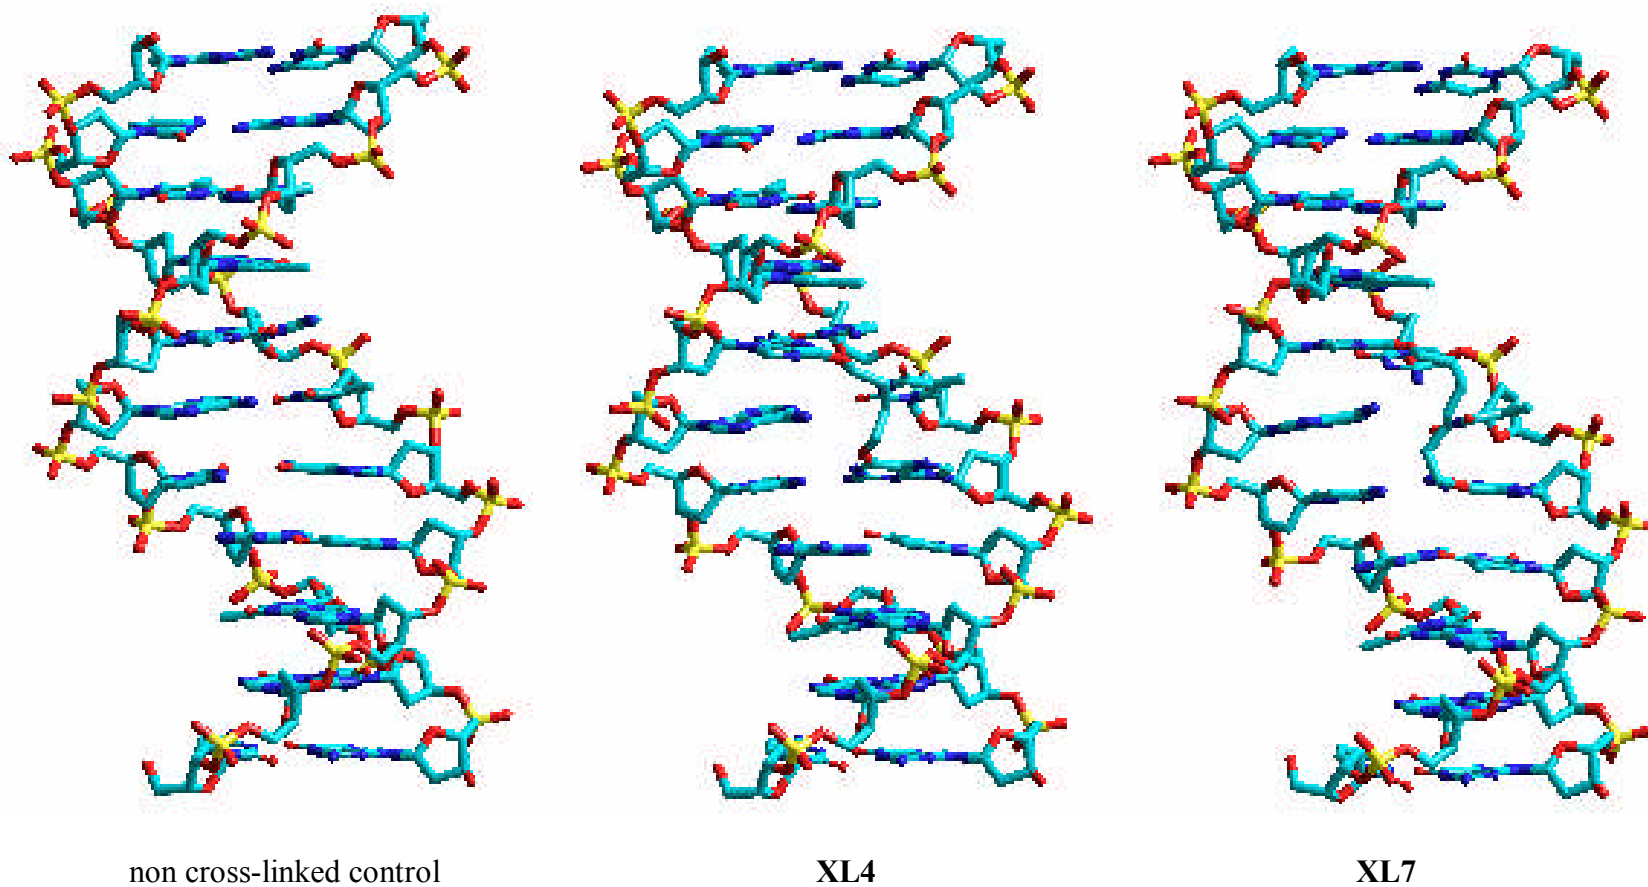

**Supplementary Figure 13** - 12% SDS-PAGE Gel of purified hAGT proteins. Loaded: lane 1, 10  $\mu$ L of Unstained Protein Molecular Weight Marker (Fermentas); lane 2, 7  $\mu$ g wild-type hAGT protein; lane 3, 7  $\mu$ g C145S hAGT protein; lane 4, 7  $\mu$ g P140A hAGT protein; lane 5, 7  $\mu$ g V148L hAGT protein.

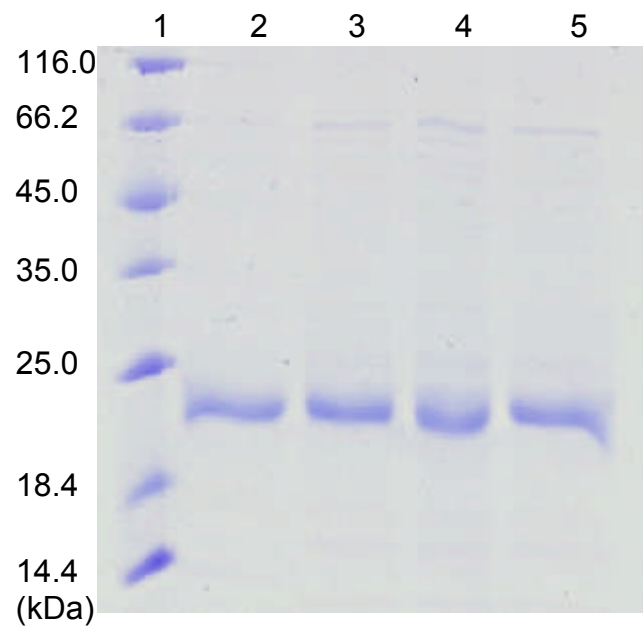

**Supplementary Figure 14** - Effects of mutations on secondary structure of hAGT by circular dichroism. Scans were taken with 5  $\mu$ M wild-type hAGT (\_\_\_\_), C145S (\_\_\_\_), P140A (\_\_\_\_) and V148L (\_\_\_\_) between 260 and 200 nm in CD buffer (260-203 nm shown due to high voltage below 203nm).

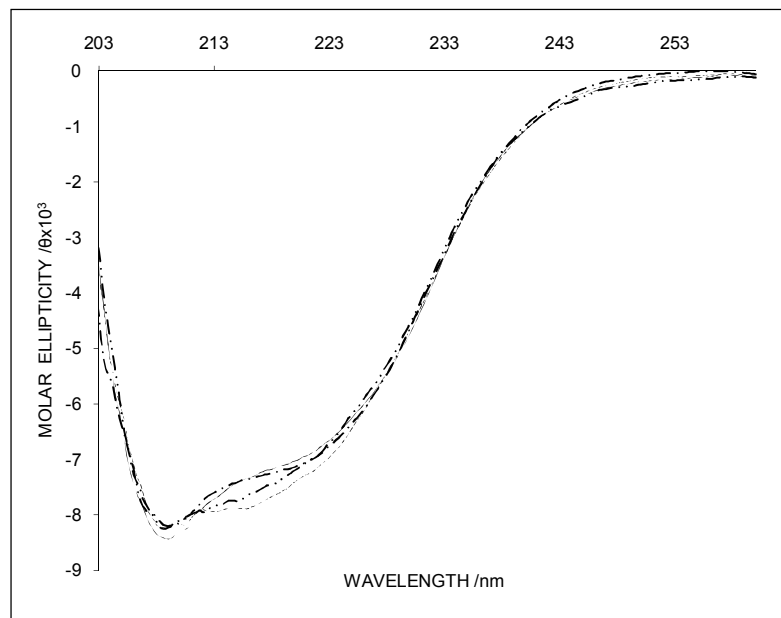

**Supplementary Figure 15** - Effects of mutations on tertiary structure of hAGT by studying the intrinsic fluorescence signals of 1 $\mu$ M of wild-type hAGT (\_\_\_\_), C145S (\_\_\_\_), P140A (\_\_\_\_) and V148L (\_\_\_\_). **(A)** Monitoring of intrinsic tryptophan and tyrosine fluorescence. **(B)** Monitoring of intrinsic tryptophan fluorescence.

**(A)**

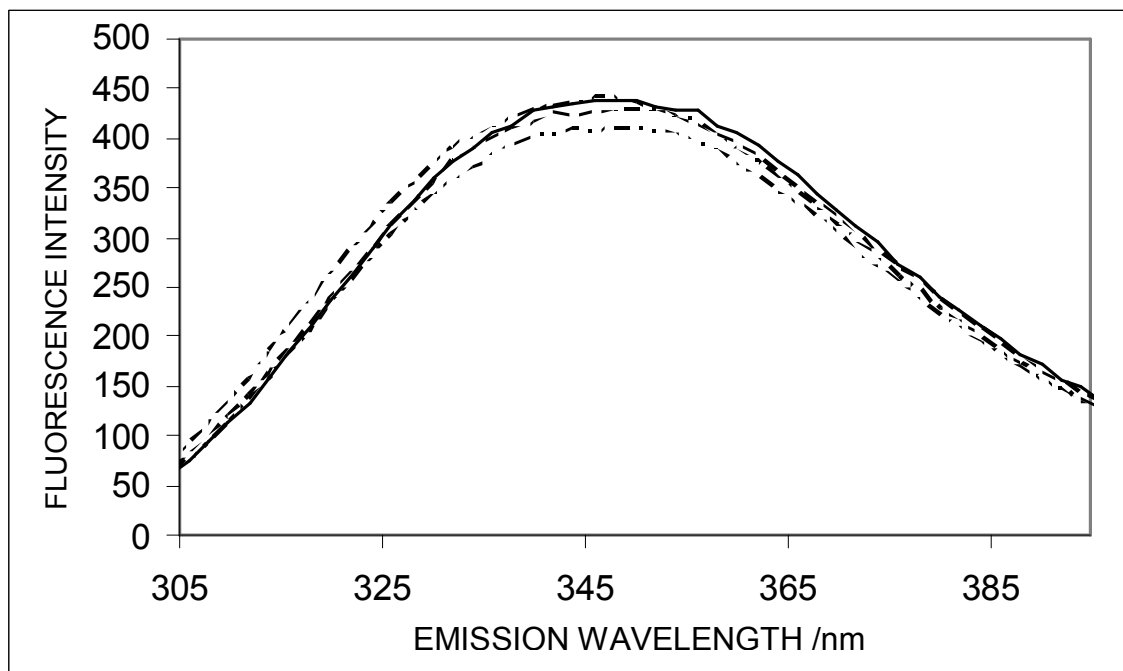

**(B)**

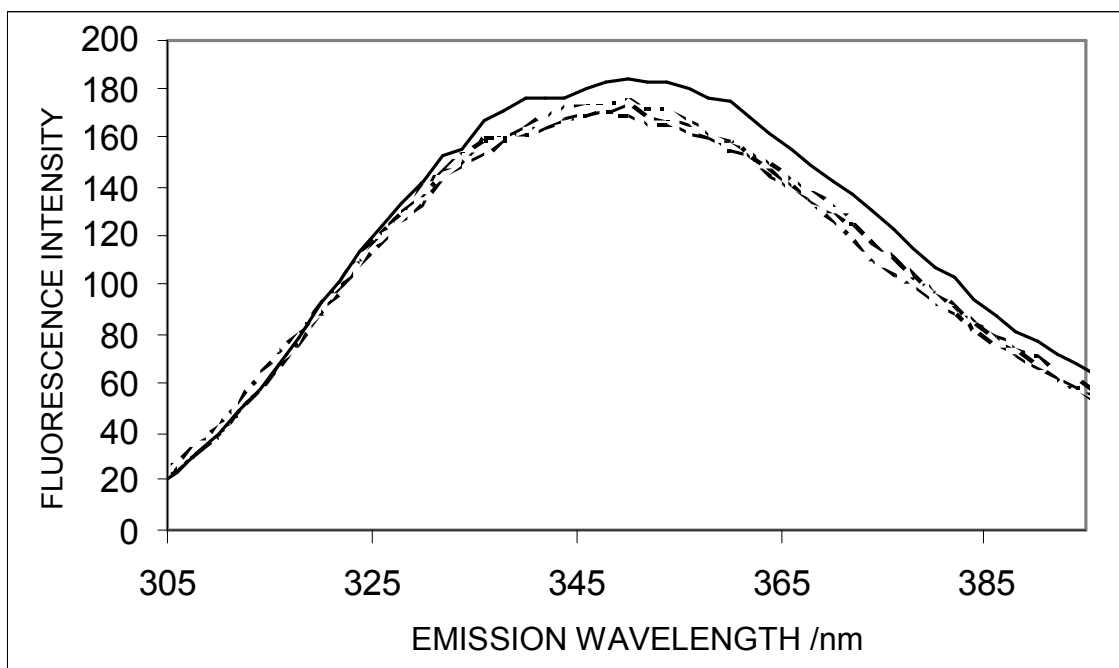



**Supplementary Figure 16** - Effect of mutations on protein stability by thermal denaturation of 5  $\mu$ M wild-type hAGT (\_\_\_\_), C145S (\_\_\_\_), P140A (\_\_\_\_) and V148L (\_\_\_\_) by monitoring the change in molar ellipticity at 222nm.

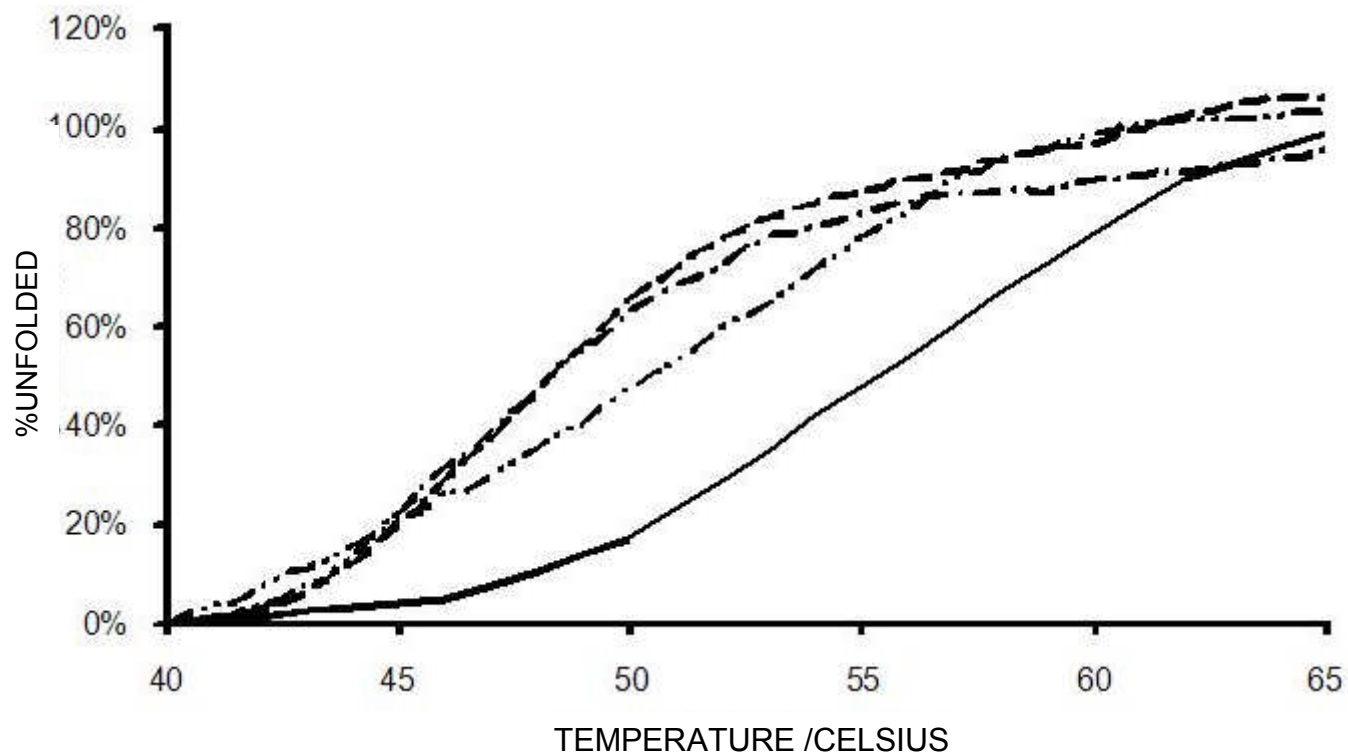

**Supplementary Figure 17** – Graphic representation of the % ICL of (A) **XL4** and (B) **XL7** remaining in the reaction tube obtained using ImageQuant™.

(A)

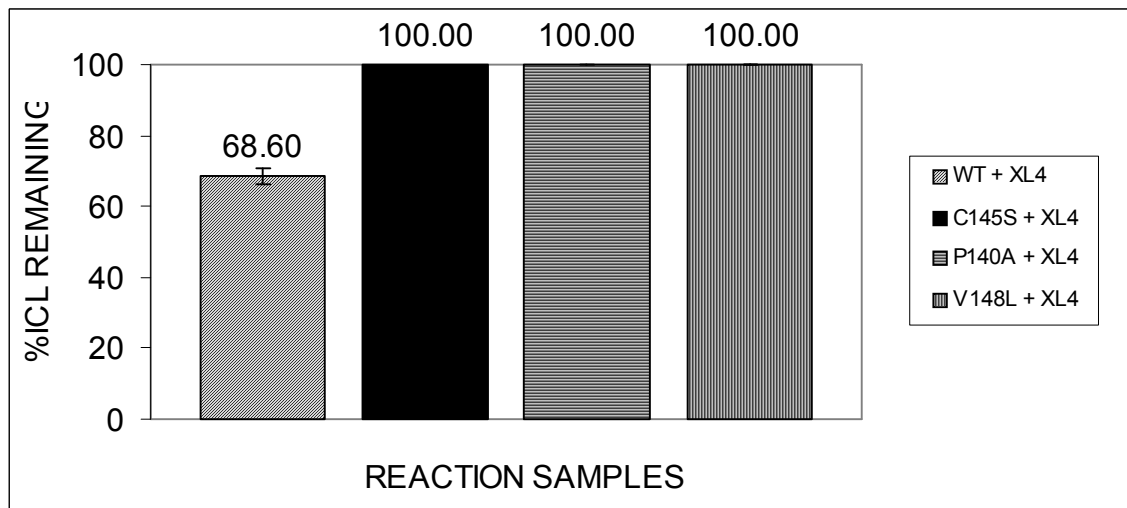

(B)

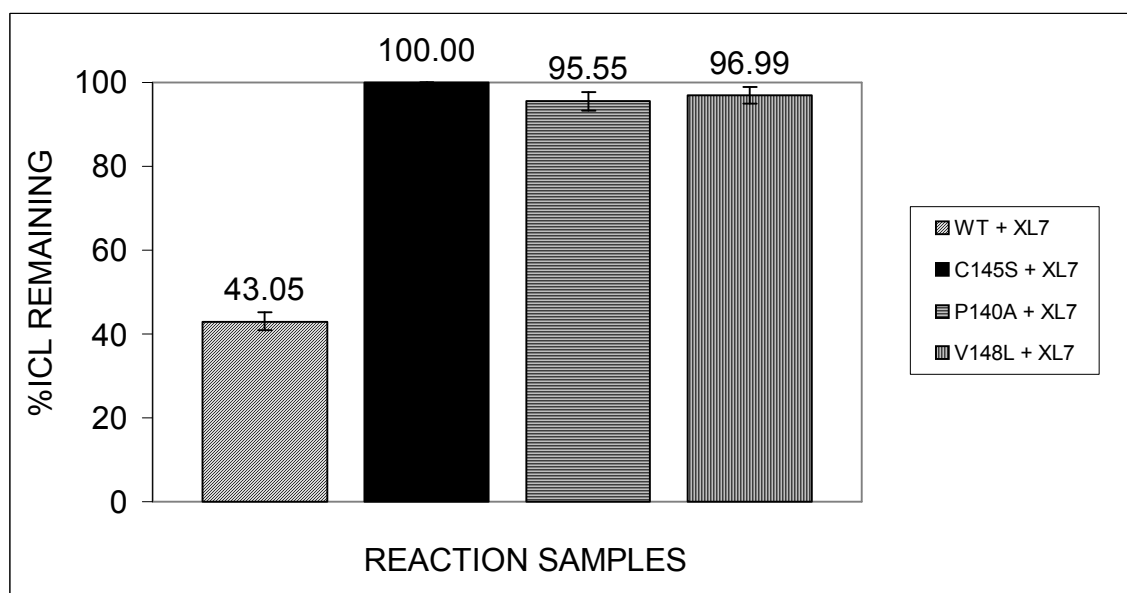

**Supplementary Figure 18** – Time course repair of **XL4** and **XL7** by hAGT. **(A)** Denaturing gel of the repair of 2 pmol of **XL4** by 60 pmol hAGT as a function of time: lane 1, 2 pmol Control; lanes 2-10, 2 pmol **XL4** + 60 pmol hAGT incubated for 0, 5, 15, 30, 60, 120, 240, 510 and 540 min, respectively **(B)** Denaturing gel of the repair of 2 pmol of **XL7** by 60 pmol hAGT as a function of time: lane 1, 2 pmol Control; lanes 2-10, 2 pmol **XL7** + 60 pmol hAGT incubated for 0, 1, 2, 5, 10, 15, 30, 60, 120 and 180 min, respectively.

**(A)**

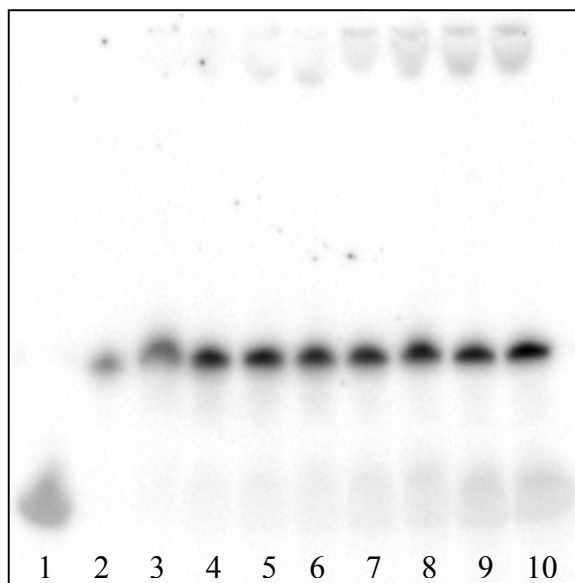

**(B)**

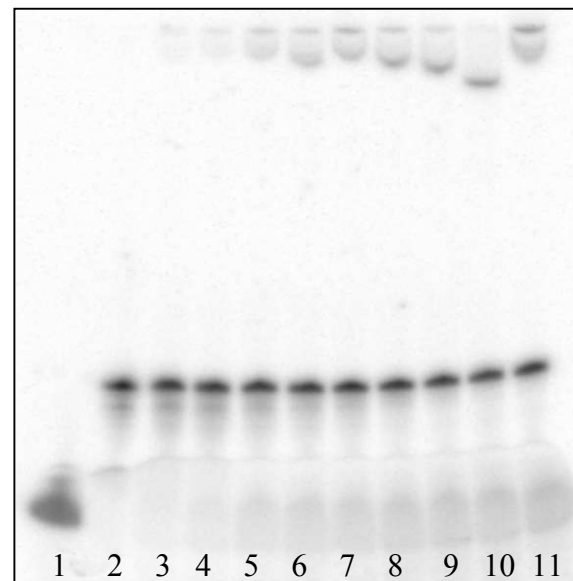

**Supplementary Figure 19** – Graphic representation of the % abundance of each species in the time course repair by hAGT of (A) **XL4** and (B) **XL7** (see Supporting Information for denaturing gels). hAGT-DNA complex/partially repaired product ( $\blacktriangle$ ); free DNA/ fully repaired product ( $\blacksquare$ ); ICL/ unrepaired substrate ( $\bullet$ ).

(A)

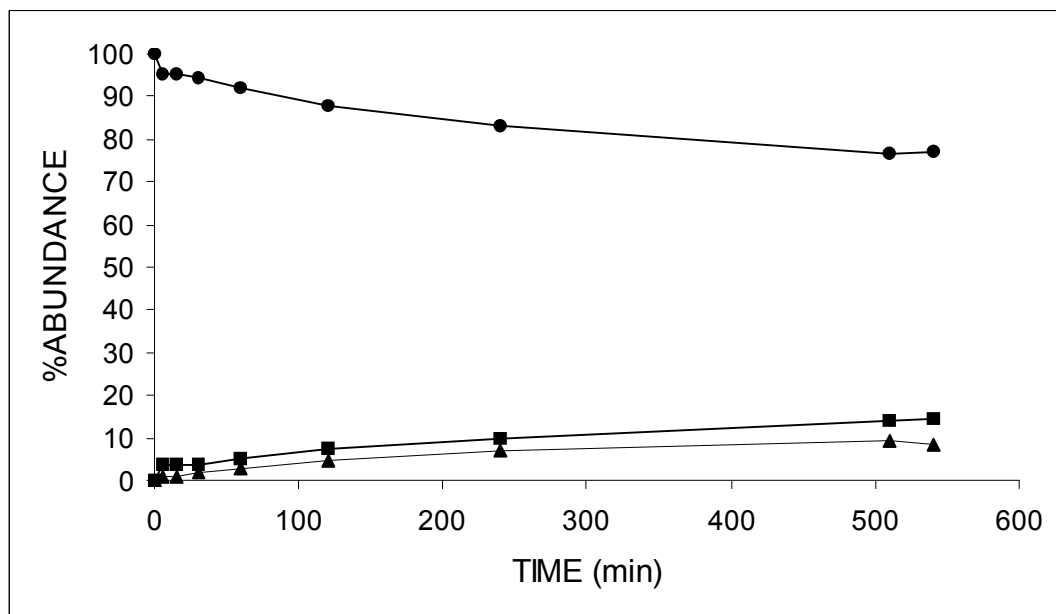

(B)

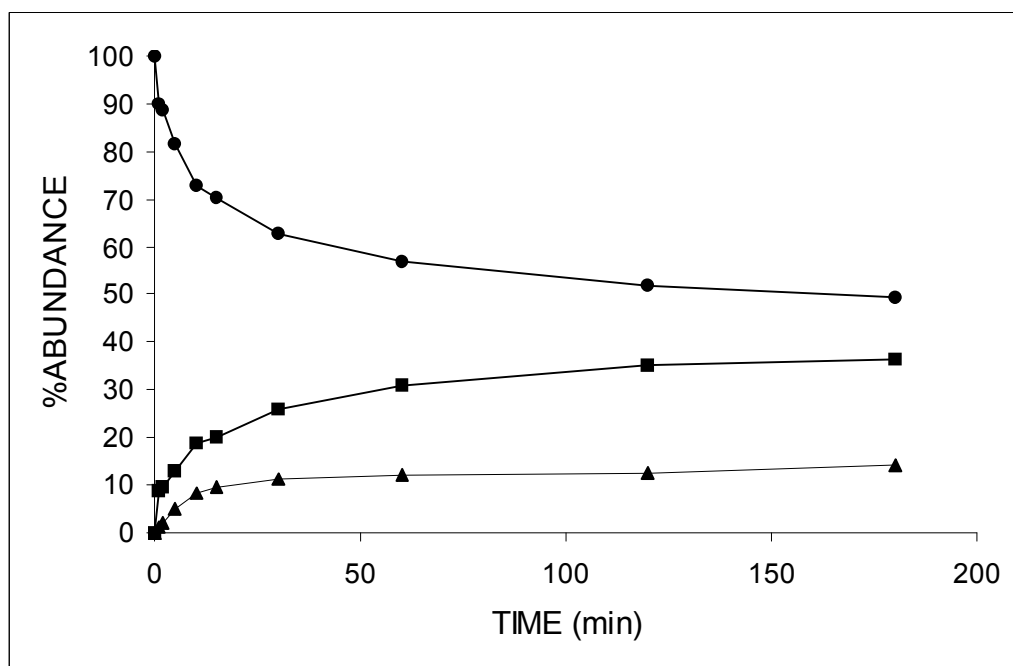

**Supplementary Figure 20** - Electromobility shift assay of C145S hAGT binding to the control DNA duplex. EMSA Gel of C145S hAGT and the control 11-mer DNA duplex. 5 nM control DNA and 0 - 35.69  $\mu$ M C145S hAGT.

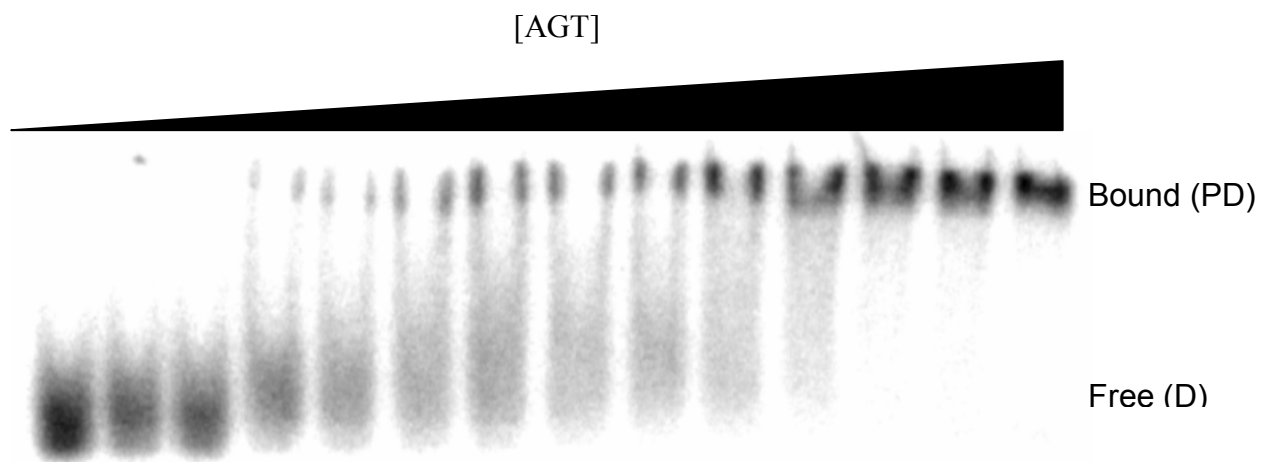

**Supplementary Figure 21** - Hill plot representation of  $\log[\text{PD}]/[\text{D}]$  versus  $\log[\text{P}]$  for the control duplex (■), XL4 (◆) and XL7 (▲).

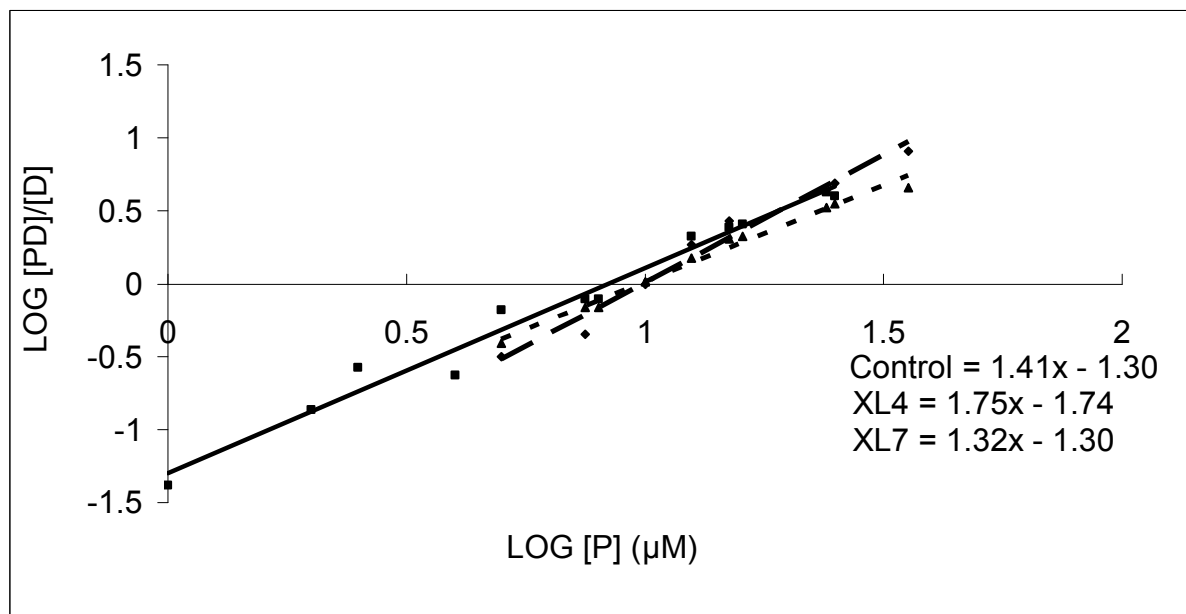

**Supplementary Table 1** - ESI-MS results of wild-type hAGT and variants

| Protein        | Molecular Weight (Da) |          |
|----------------|-----------------------|----------|
|                | Calculated            | Observed |
| Wild-Type hAGT | 21876.2               | 21875.0  |
| C145S          | 21860.1               | 21860.0  |
| P140A          | 21850.1               | 21850.5  |
| V148L          | 21890.2               | 21889.5  |

**Supplementary Table 2** – Effect of mutations on fluorescence emission signals of intrinsic hAGT on Tryptophan and Tyrosine ( $\lambda_{ex}$  280nm) and Tryptophan only ( $\lambda_{ex}$  295nm).

| Protein        | $\lambda_{ex}$ 280nm   |                           | $\lambda_{ex}$ 295nm   |                           |
|----------------|------------------------|---------------------------|------------------------|---------------------------|
|                | $\lambda_{em}$<br>(nm) | Fluorescence<br>Intensity | $\lambda_{em}$<br>(nm) | Fluorescence<br>Intensity |
| Wild-Type hAGT | 346                    | 438                       | 350                    | 184                       |
| C145S          | 350                    | 409                       | 350                    | 176                       |
| P140A          | 346                    | 440                       | 348                    | 169                       |
| V148L          | 350                    | 428                       | 350                    | 173                       |



**Supplementary Table 3** - Difference in  $T_m$  between mutants and wild-type hAGT.

| Protein        | Melting Temperature (°C) |           |            |
|----------------|--------------------------|-----------|------------|
|                | Observed                 | Wild-Type | Difference |
| Wild-Type hAGT | 56.5                     | 56.5      | 0.0        |
| C145S          | 50.7                     | 56.5      | -5.8       |
| P140A          | 47.0                     | 56.5      | -9.5       |
| V148L          | 48.0                     | 56.5      | -8.5       |
